# Supplementary material
Source: publisher site journal article supplement (https://www.dovepress.com/article/374530)

**APPENDIX A**

**Participating clinical sites:**

1. Eye Research Foundation, Newport Beach, CA 92663
2. Piedmont Eye Center, Lynchburg, VA 24502
3. Vita Eye Clinic, Shelby, NC 28150
4. Vision Institute, Colorado Springs, CO 80907
5. The Eye Care Institute, Louisville, KY 40206
6. Midwest Cornea Associates, LLC, Carmel, IN 46290
7. Andover Eye Associates, Andover, MA 01810
8. Total Eye Care, P.A., Memphis, TN 38119

**APPENDIX B**

Collarette grading scale (non-linear)


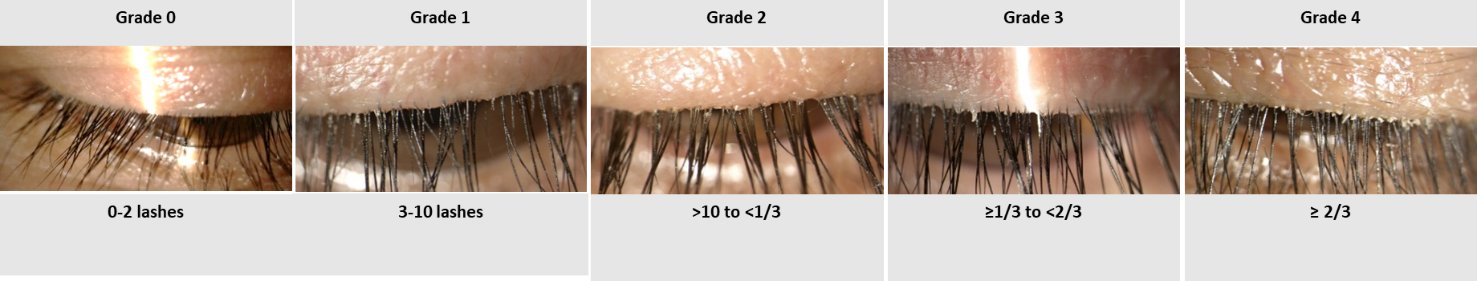


Lid Margin erythema grading scale (non-linear)


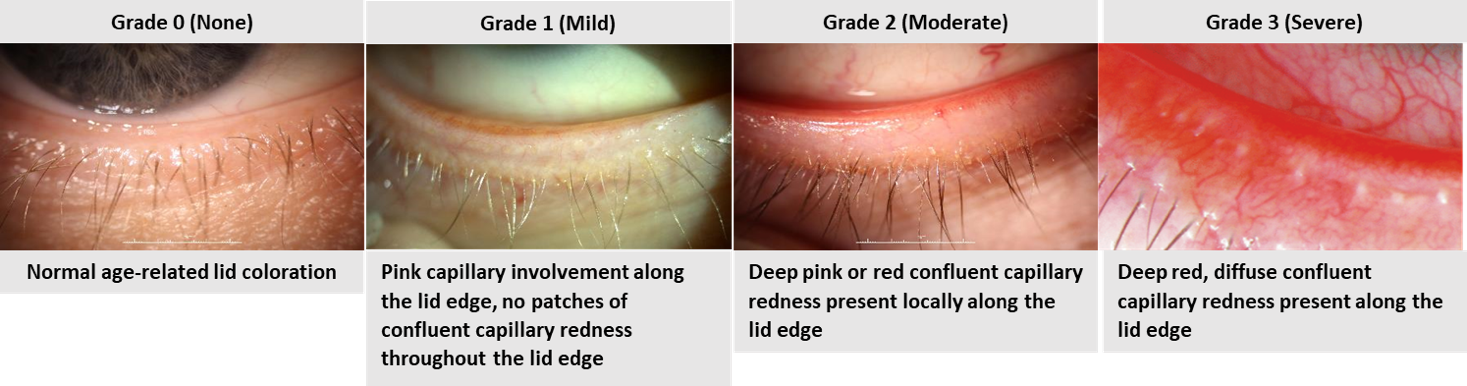

Supplement: Supplementary file 1 [file get_supplementary_file.php]
